# Supplementary material
Source: Springer Nature journal article supplement (https://www.springermedizin.de/resource/supplementary/12882_2003_23_MOESM1_ESM.pdf/9454786)

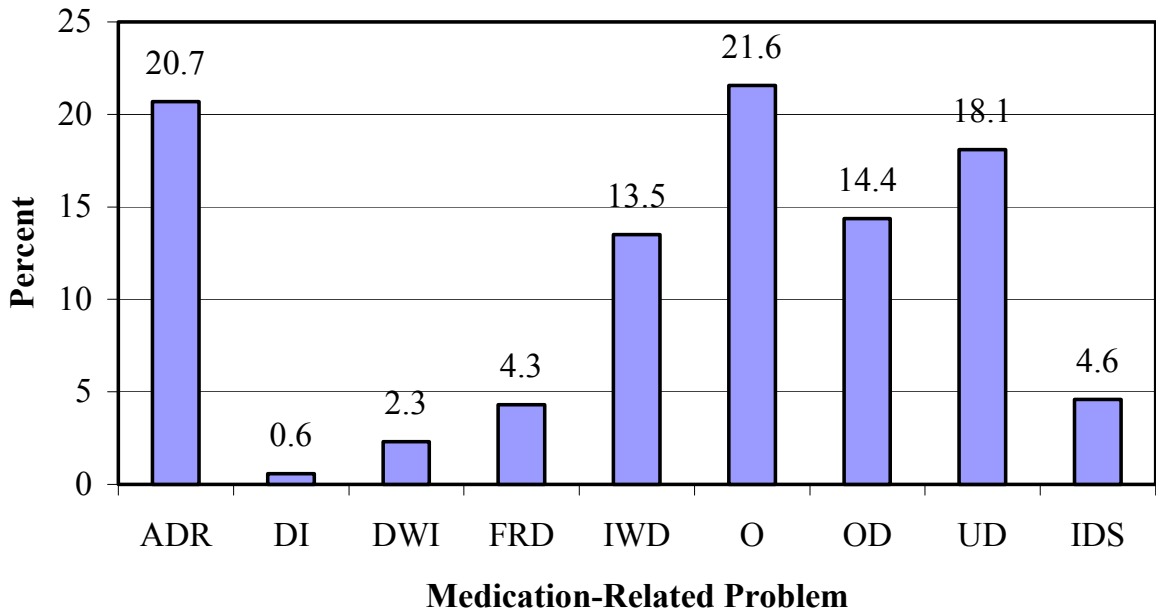

Supplement: MOESM1 [file 9454786]
